# Supplementary material
Source: Springer Nature journal article supplement (https://www.springermedizin.de/resource/supplementary/12872_2010_320_MOESM1_ESM.pdf/9429694)

A

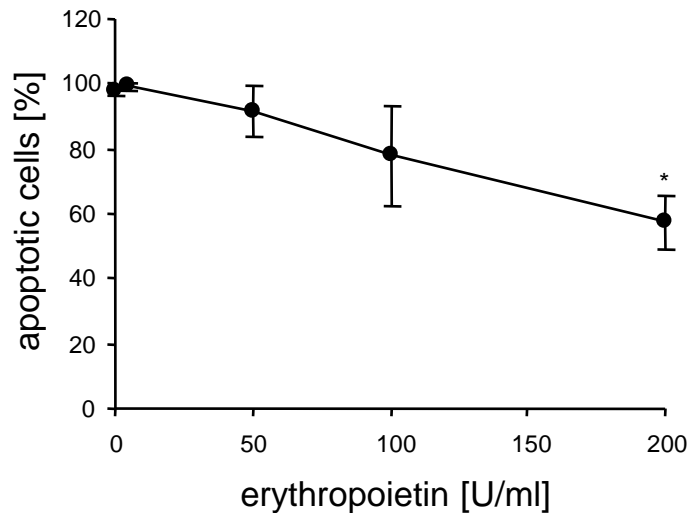

B

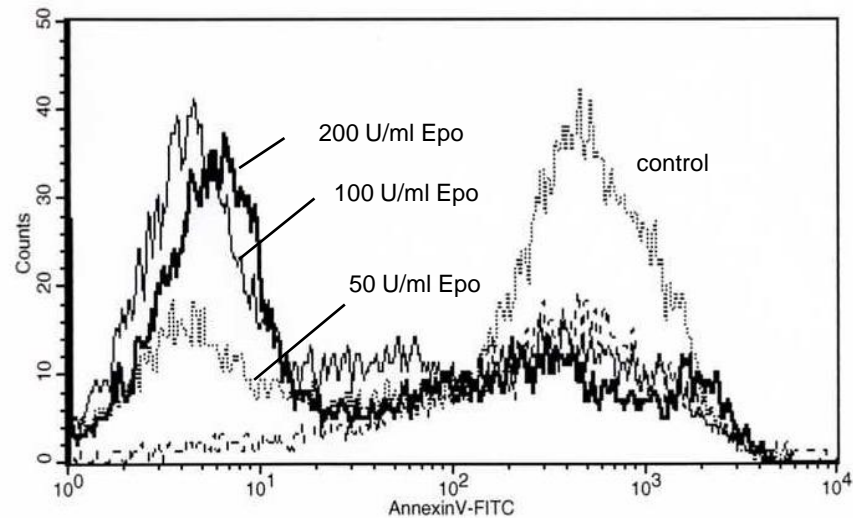

C

### Erythropoietin-induced expression in eEPC [fold increase]

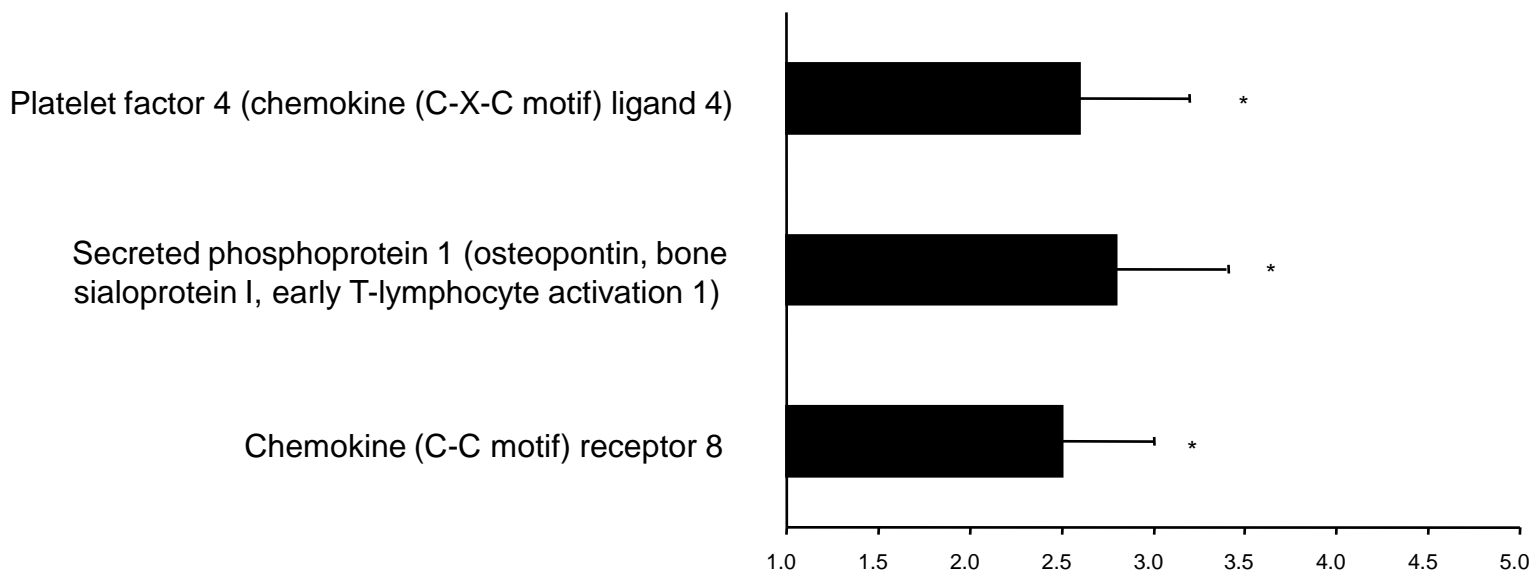

Supplement: MOESM1 [file 9429694]
